# Supplementary material for: The Metabolite Content of the Post-Culture Medium of the Tree Fern Cyathea delgadii Sternb. Cell Suspension Cultured in the Presence of 2,4-D and BAP
Source: MDPI journal article supplement (doi:10.3390/ijms231911783), 2022-10-04
Supplement: s1 [file s1]

**Supplementary Table S1.** List of identified compounds using GC-MS

| Compound                 | RT [min] | RI       | Height     | Area       | S/N      | class      | Number of compounds identified within the class |
|--------------------------|----------|----------|------------|------------|----------|------------|-------------------------------------------------|
| Glycerol                 | 9,323742 | 1275,176 | 711811,7   | 1014213    | 26,61958 | alcohol    | 4                                               |
| R-(-)-1-Amino-2-propanol | 10,13326 | 1332,386 | 1684700    | 2765975    | 103,3888 | alcohol    |                                                 |
| 1,2,4-benzenetriol       | 13,5414  | 1595,33  | 44877960   | 78537440   | 28,72021 | alcohol    |                                                 |
| 1-Hexadecanol            | 17,47334 | 1958,374 | 1089416    | 1918272    | 106,3345 | alcohol    |                                                 |
| Hydroxylamine            | 6,976822 | 1070,124 | 8702739    | 20609051   | 121,1292 | amine      | 4                                               |
| UDP-N-acetylglucosamine  | 16,08899 | 1823,317 | 8041777    | 16461500   | 5,146434 | amine      |                                                 |
| N-acetylmannosamine      | 18,94951 | 2112,248 | 90119,64   | 202925,2   | 8,447474 | amine      |                                                 |
| n-acetyl-d-hexosamine    | 19,08897 | 2127,163 | 6061407    | 10431642   | 46,85211 | amine      |                                                 |
| Alanine                  | 7,191107 | 1091,812 | 19638151,5 | 36516334,8 | 1088,349 | amino acid | 10                                              |
| Sarcosine                | 7,344167 | 1107,304 | 249412,3   | 342767,8   | 11,53388 | amino acid |                                                 |
| Valine                   | 8,50062  | 1217,005 | 4858378    | 13354560   | 164,9823 | amino acid |                                                 |
| proline                  | 9,660475 | 1298,974 | 90565880   | 164617000  | 2888,208 | amino acid |                                                 |
| Glycine                  | 9,7251   | 1303,541 | 29038300   | 81379789,2 | 1044,492 | amino acid |                                                 |
| Threonine                | 10,83053 | 1381,663 | 2949845    | 5303479    | 24,73374 | amino acid |                                                 |
| L-5-Oxoproline           | 12,57201 | 1518,089 | 776394400  | 1346671000 | 29121,3  | amino acid |                                                 |
| L-Glutamic acid          | 13,76248 | 1614,443 | 4038458    | 6527331    | 301,1509 | amino acid |                                                 |
| Phenylalanine            | 13,84752 | 1622,001 | 5814585    | 10077240   | 48,85922 | amino acid |                                                 |
| Ornithine                | 15,27267 | 1748,682 | 8230961    | 15993660   | 297,9681 | amino acid |                                                 |
| Heptanoic acid           | 7,854367 | 1158,944 | 5788162    | 20208540   | 266,4101 | fatty acid | 12                                              |
| Octanoic acid            | 9,218302 | 1267,724 | 335725,4   | 522620,8   | 6,791001 | fatty acid |                                                 |
| Nonanoic acid            | 10,53462 | 1360,75  | 8003666    | 12454460   | 48,21593 | fatty acid |                                                 |
| Decanoic acid            | 11,80332 | 1456,838 | 2654851    | 3951318    | 12,18863 | fatty acid |                                                 |
| Lauric acid              | 14,17064 | 1650,724 | 4003397    | 7031527    | 24,13218 | fatty acid |                                                 |
| METHYL PALMITATE         | 17,14001 | 1925,854 | 4478071    | 9139183    | 27,38671 | fatty acid |                                                 |
| Pentadecanoic acid       | 17,34068 | 1945,433 | 1257972    | 1776703    | 122,7868 | fatty acid |                                                 |
| Palmitic acid            | 18,29306 | 2042,038 | 178203891  | 292565787  | 1074,098 | fatty acid |                                                 |

|                               |          |          |            |           |          |              |    |
|-------------------------------|----------|----------|------------|-----------|----------|--------------|----|
| Linoleic acid                 | 19,83386 | 2207,426 | 638783     | 1016335   | 2,932702 | fatty acid   |    |
| Oleic acid                    | 19,89169 | 2214,149 | 3402521    | 5984490   | 20,51014 | fatty acid   |    |
| Stearic acid                  | 20,12297 | 2241,043 | 77271503,5 | 132194705 | 464,6577 | fatty acid   |    |
| Icosanoic acid                | 21,80663 | 2439,579 | 1207270    | 2359773   | 7,277335 | fatty acid   |    |
| 5,6-Dihydrouracil             | 7,45641  | 1118,665 | 103988000  | 164591700 | 112,5235 | nucleic acid | 5  |
| Uracil                        | 10,17748 | 1335,511 | 90710808,3 | 141093161 | 6108,116 | nucleic acid |    |
| Thymine                       | 11,02441 | 1395,365 | 304492527  | 488884860 | 20854,74 | nucleic acid |    |
| 2-Thiouracil                  | 11,5244  | 1434,614 | 12174470   | 20818360  | 511,4374 | nucleic acid |    |
| Cytosine                      | 12,58222 | 1518,902 | 9346211    | 14272720  | 911,3381 | nucleic acid |    |
| lactic acid                   | 6,286352 | 1000,238 | 267047253  | 950958902 | 282,0074 | organic acid | 29 |
| Glycolic acid                 | 6,504037 | 1022,271 | 65473060,8 | 196068337 | 69,18887 | organic acid |    |
| Methylmalonic acid            | 8,7047   | 1231,428 | 3081531    | 4117324   | 3,334467 | organic acid |    |
| 4-hydroxybutyric acid         | 8,80674  | 1238,639 | 128383500  | 208915400 | 138,9214 | organic acid |    |
| Benzoic acid                  | 8,993814 | 1251,86  | 25600340   | 45685710  | 1133,228 | organic acid |    |
| Nicotinic acid                | 9,633264 | 1297,05  | 13642320   | 22111730  | 828,7513 | organic acid |    |
| Succinic acid(or anhydride)   | 9,884962 | 1314,838 | 46637390   | 76172120  | 50,46546 | organic acid |    |
| Methyl succinic acid          | 10,04142 | 1325,896 | 737979,3   | 1019418   | 6,198655 | organic acid |    |
| Glyceric acid                 | 10,08224 | 1328,78  | 2723424    | 3240191   | 2,946967 | organic acid |    |
| Succinic acid                 | 10,25911 | 1341,28  | 10661710   | 18603790  | 11,53684 | organic acid |    |
| pyrrole-2-carboxylic acid     | 10,37135 | 1349,212 | 29713540   | 48536050  | 2677,229 | organic acid |    |
| 4-Methyl benzoic acid         | 10,40877 | 1351,856 | 4387237    | 7894057   | 93,4573  | organic acid |    |
| 3-aminoisobutyric acid        | 10,97679 | 1391,999 | 29879630   | 77793450  | 1081,669 | organic acid |    |
| GABA                          | 11,79651 | 1456,296 | 3915140    | 6923215   | 141,7316 | organic acid |    |
| L-(-)-Malic acid              | 12,15365 | 1484,753 | 4233440    | 7474750   | 4,580928 | organic acid |    |
| isothreonic acid              | 12,82372 | 1538,145 | 6161975    | 9476098   | 6,667758 | organic acid |    |
| 5-hydroxymethyl-2-furoic acid | 12,93596 | 1547,088 | 1548220    | 2208645   | 1,675301 | organic acid |    |
| 3-Hydroxybenzoic acid         | 13,13664 | 1563,079 | 8503989    | 13717830  | 410,404  | organic acid |    |
| 4-Hydroxybenzoic acid         | 13,87473 | 1624,42  | 42490940   | 70962300  | 1171,358 | organic acid |    |
| vanillic acid                 | 15,40193 | 1760,171 | 3653387    | 5915464   | 361,7907 | organic acid |    |
| (-)-Shikimic acid             | 15,87811 | 1802,743 | 1140398    | 1893441   | 7,644417 | organic acid |    |

|                                                                           |          |          |            |            |          |              |    |
|---------------------------------------------------------------------------|----------|----------|------------|------------|----------|--------------|----|
| Citric acid                                                               | 15,96995 | 1811,702 | 9481352    | 23918050   | 302,3145 | organic acid | 12 |
| 3,4-dihydroxybenzoic acid                                                 | 15,99716 | 1814,357 | 13856070   | 24497440   | 295,1632 | organic acid |    |
| Myristic acid                                                             | 16,3509  | 1848,868 | 21435,25   | 45230,6    | 3,743196 | organic acid |    |
| 5-Keto-D-Gluconic acid                                                    | 17,24205 | 1935,809 | 249622,1   | 407987,8   | 42,85948 | organic acid |    |
| galactonic acid                                                           | 17,42912 | 1954,06  | 21086490   | 38666090   | 13,49456 | organic acid |    |
| isohexonic acid                                                           | 17,78286 | 1988,572 | 4659,486   | 5407,36    | 3,987616 | organic acid |    |
| Gluconic acid                                                             | 17,80667 | 1990,895 | 23177555,3 | 42024558,2 | 14,73119 | organic acid |    |
| lactobionic acid                                                          | 24,5311  | 2793,437 | 1682548    | 2700757    | 4,702557 | organic acid |    |
| 2-Hydroxypyridine                                                         | 6,038055 | 975,1068 | 569600,6   | 1046204    | 26,39459 | other        |    |
| butyrolactam                                                              | 7,527838 | 1125,895 | 7080447    | 20817440   | 225,8003 | other        |    |
| 4-Hydroxypyridine                                                         | 7,66049  | 1139,321 | 4915400    | 9117093    | 276,6492 | other        |    |
| SPIRO(3.5)SILANONANONE                                                    | 7,847563 | 1158,255 | 44371790   | 76082680   | 2029,835 | other        |    |
| 1,1-DICHLORO-2-PHENYLETHENE                                               | 9,837343 | 1311,473 | 934813     | 1443840    | 18,90926 | other        | 6  |
| 3-Aminopropionitrile                                                      | 10,38156 | 1349,933 | 14316730   | 22549770   | 558,6666 | other        |    |
| erythronic acid lactone                                                   | 10,63666 | 1367,962 | 8828366    | 19336960   | 5,649822 | other        |    |
| 1,3-dihydroxypyridine                                                     | 10,81693 | 1380,702 | 6423153    | 11315090   | 578,7346 | other        |    |
| hydroquinone                                                              | 11,07203 | 1398,73  | 4757308    | 7701704    | 383,8413 | other        |    |
| Nicotinamide                                                              | 12,07882 | 1478,791 | 3810816    | 7305001    | 168,6902 | other        |    |
| acetaminophen                                                             | 13,90194 | 1626,839 | 10665380   | 19898960   | 180,9615 | other        |    |
| beta-mannosylglycerate                                                    | 19,55495 | 2177     | 734337,5   | 1205928    | 3,198426 | other        |    |
| HYDROCINNAMIC ACID/4-                                                     |          |          |            |            |          |              |    |
| hydroxycinnamic acid                                                      | 11,85093 | 1460,632 | 136583,2   | 134433,4   | 7,195429 | phenolics    |    |
| CINNAMIC ACID                                                             | 14,26588 | 1659,189 | 243876,8   | 456864,3   | 9,147424 | phenolics    |    |
| 2-Coumaric acid/2-hydroxycinnamic acid                                    | 16,29308 | 1843,227 | 169213,2   | 202307,2   | 7,148858 | phenolics    |    |
| Ferulic acid/trans-4-Hydroxy-3-methoxycinnamic acid                       | 18,72503 | 2088,238 | 1433168    | 2666955    | 365,1676 | phenolics    | 6  |
| trans-4-Hydroxy-3-methoxycinnamate/trans-4-Hydroxy-3-methoxycinnamic acid | 18,73523 | 2089,33  | 1615574    | 1823734    | 47,93757 | phenolics    |    |
| Caffeic acid/3,4-dihydroxycinnamic acid                                   | 19,14339 | 2132,983 | 3528194    | 6707794    | 59,08244 | phenolics    |    |
| enolpyruvate                                                              | 6,653695 | 1037,419 | 36378340   | 100385200  | 39,36433 | phosphate    |    |
| Pyrophosphoric acid                                                       | 9,279525 | 1272,051 | 1085775000 | 1868572000 | 105979,2 | phosphate    |    |

|                                |          |          |            |            |          |           |
|--------------------------------|----------|----------|------------|------------|----------|-----------|
| phosphate                      | 9,306735 | 1273,974 | 7050545    | 18687070   | 59,24483 | phosphate |
| glucose-1-phosphate            | 15,3305  | 1753,822 | 118259490  | 203274240  | 215,6438 | phosphate |
| glucose-6-phosphate            | 20,72501 | 2311,048 | 1076078    | 2167622    | 185,9737 | phosphate |
| inositol-4-monophosphate       | 21,54133 | 2406,417 | 252440,9   | 495150     | 29,27008 | phosphate |
| erythrose                      | 11,70808 | 1449,249 | 2728829    | 4790982    | 2,952816 | sugar     |
| xylonolactone                  | 13,65704 | 1605,07  | 55273,3    | 149167,6   | 6,37598  | sugar     |
| D-(-)-Ribose                   | 14,40534 | 1671,585 | 84093020   | 175114000  | 53,81636 | sugar     |
| Lyxose                         | 14,41894 | 1672,795 | 582777,4   | 939312,6   | 54,62738 | sugar     |
| D-Xylulose                     | 14,42574 | 1673,399 | 325700,9   | 610548,7   | 14,07167 | sugar     |
| 1,6-Anhydro-beta-D-glucose     | 14,71146 | 1698,796 | 124750200  | 229150700  | 79,83541 | sugar     |
| methylhexose nist              | 15,8475  | 1799,778 | 1160765    | 1795277    | 4,918575 | sugar     |
| D-(+)-Galactose                | 16,39511 | 1853,182 | 118890,3   | 172845,6   | 26,90545 | sugar     |
| L-(-)-Sorbose                  | 16,49375 | 1862,805 | 12779130   | 31050770   | 1512,61  | sugar     |
| D-(-)-Fructose                 | 16,52436 | 1865,792 | 1432237813 | 2362884445 | 549,0305 | sugar     |
| Tagatose                       | 16,54477 | 1867,783 | 9051,094   | 10026,69   | 2,669873 | sugar     |
| glucose                        | 16,67062 | 1880,061 | 258719854  | 416084441  | 162,7234 | sugar     |
| glycerol-3-galactoside         | 20,02774 | 2229,969 | 2462719    | 4445967    | 10,72644 | sugar     |
| glycerol-3-galactoside 2       | 20,66379 | 2303,929 | 113084,8   | 243058,5   | 3,473709 | sugar     |
| Salicyl alcohol-beta-glucoside | 22,38826 | 2512,283 | 559885,8   | 1083993    | 42,39275 | sugar     |
| Sucrose                        | 22,83724 | 2568,405 | 1906690666 | 7094500115 | 5445,98  | sugar     |
| alpha-Lactose                  | 23,58553 | 2666,515 | 4095469,13 | 6783524,23 | 3,269258 | sugar     |
| Maltose                        | 23,7522  | 2688,886 | 151428,5   | 290275,8   | 26,70021 | sugar     |
| D-(+)-Trehalose                | 24,12634 | 2739,107 | 510663200  | 1902343000 | 4951,238 | sugar     |
| Melibiose                      | 24,24199 | 2754,629 | 610831,475 | 1246917,13 | 35,45736 | sugar     |
| Turanose                       | 24,57872 | 2799,829 | 1366022    | 1926392    | 3,817898 | sugar     |
| beta-gentiobiose               | 24,67396 | 2812,612 | 1985346    | 4643381    | 8,64723  | sugar     |
| Trehalose                      | 25,25899 | 2891,139 | 668445,8   | 1537452    | 50,61255 | sugar     |
| inulotriose                    | 30,47323 | 3448,303 | 137233,2   | 294766,6   | 10,39085 | sugar     |
| 1-kestose                      | 30,58888 | 3460,008 | 60261,38   | 116125,1   | 15,53266 | sugar     |
| Maltotriose                    | 31,11949 | 3513,713 | 1569942,9  | 9151420    | 94,00894 | sugar     |

|                 |          |          |            |            |          |               |    |
|-----------------|----------|----------|------------|------------|----------|---------------|----|
| D-Panose        | 32,77594 | 3681,37  | 742836,948 | 4211181,62 | 3,219192 | sugar         | 15 |
| Meso erythritol | 12,38154 | 1502,912 | 25239026   | 54273787   | 108,3589 | sugar alcohol |    |
| Pyrogallol      | 12,80671 | 1536,79  | 26689010   | 44466440   | 2153,391 | sugar alcohol |    |
| deoxypentitol   | 13,70466 | 1609,303 | 9344517    | 17365170   | 5,980139 | sugar alcohol |    |
| Xylitol         | 14,22506 | 1655,561 | 303835,3   | 655800,3   | 6,23469  | sugar alcohol |    |
| levoglucosan    | 14,48016 | 1678,237 | 1119476    | 1761105    | 3,128825 | sugar alcohol |    |
| D-Arabitol      | 14,89172 | 1714,82  | 3631846    | 5506616    | 10,15065 | sugar alcohol |    |
| Ribitol         | 14,94615 | 1719,657 | 2181283,9  | 3323971    | 16,25092 | sugar alcohol |    |
| pinitol         | 16,44273 | 1857,828 | 1156759    | 1793938    | 7,128245 | sugar alcohol |    |
| L-Iditol        | 16,97674 | 1909,926 | 366103923  | 590457538  | 2447,581 | sugar alcohol |    |
| D-(-)-Sorbitol  | 17,1196  | 1923,863 | 4716104    | 6875739    | 3,018129 | sugar alcohol |    |
| Myo-Inositol    | 18,69782 | 2085,328 | 119257600  | 204229900  | 76,32036 | sugar alcohol |    |
| glucoheptulose  | 21,1944  | 2365,627 | 85052880   | 149287000  | 54,43064 | sugar alcohol |    |
| lactitol        | 24,2692  | 2758,282 | 12305390   | 22372090   | 53,59646 | sugar alcohol |    |
| maltitol        | 24,7862  | 2827,678 | 2375626    | 6438989    | 6,639638 | sugar alcohol |    |
| Galactinol      | 25,14675 | 2876,073 | 31007210,1 | 79895521,6 | 113,5515 | sugar alcohol |    |
